# Supplementary material for: Development and Functionality of a Parsimonious Digital Food Frequency Questionnaire for a Clinical Intervention among an Indigenous Population
Source: MDPI journal article supplement (doi:10.3390/nu15235012), 2023-12-04
Supplement: s1 [file s1]

## Supplemental File S6. Offline Kaat Koort Food Frequency Questionnaire

**TEMPLATE:** Fill in 'Frequency'\* & 'Number of portions' for all items consumed **at least once a month**.

Ask about **Extra items**; if yes add item name, portion, frequency and # portions.

<sup>s</sup>Item repeated in 1 other meal. <sup>ss</sup>Item repeated in 2 other meals.

| Participant ID: _____ Visit #: _____ Date: _____                       | Portion size | # units in portion | Frequency* | Number of portions |
|------------------------------------------------------------------------|--------------|--------------------|------------|--------------------|
| <b>FFQ items</b>                                                       |              |                    |            |                    |
| <b>Breakfast/Brunch</b>                                                |              |                    |            |                    |
| <b>Grains-Starches</b>                                                 |              |                    |            |                    |
| Breakfast cereal, refined (corn, oats, rice) <sup>s</sup>              | cup          | 1                  |            |                    |
| Breakfast cereal, whole grain (Weetbix, All Bran)                      | cup          | 1                  |            |                    |
| Porridge, rolled oats, cooked                                          | cup          | 1                  |            |                    |
| Sugar, white (for cereal)                                              | teaspoon     | 1                  |            |                    |
| <b>Extra items: (e.g., sugar-coated cereal, muesli bars)</b>           |              |                    |            |                    |
|                                                                        |              | 1                  |            |                    |
|                                                                        |              | 1                  |            |                    |
| <b>Bread</b>                                                           |              |                    |            |                    |
| Bread/toast, white flour <sup>ss</sup>                                 | slice        | 1                  |            |                    |
| Bread/toast, wholemeal/mixed grain flour <sup>ss</sup>                 | slice        | 1                  |            |                    |
| <b>Extra items: (e.g., damper, crumpets, savoury biscuits)</b>         |              |                    |            |                    |
|                                                                        |              | 1                  |            |                    |
|                                                                        |              | 1                  |            |                    |
| <b>Spreads-Sauces</b>                                                  |              |                    |            |                    |
| Butter, plain, salted <sup>ss</sup>                                    | teaspoon     | 1                  |            |                    |
| Margarine, regular <sup>ss</sup>                                       | teaspoon     | 1                  |            |                    |
| Vegetemite/Promote <sup>ss</sup>                                       | teaspoon     | 1                  |            |                    |
| Honey                                                                  | teaspoon     | 1                  |            |                    |
| <b>Extra items: (e.g., peanut butter, reduced-salt margarine, jam)</b> |              |                    |            |                    |
|                                                                        |              | 1                  |            |                    |
|                                                                        |              | 1                  |            |                    |
|                                                                        |              | 1                  |            |                    |

\*Frequency:

If consumed at least once a week, provide exact number of days per week (1 to 7).

If consumed at least once a month but less than once a week, provide code for times per month (M1, M2, M3).

**TEMPLATE:** Fill in 'Frequency'\* & 'Number of portions' for all items consumed **at least once a month**.

Ask about **Extra items**; if yes add item name, portion, frequency and # portions.

<sup>\$</sup>Item repeated in 1 other meal. <sup>\$\$</sup>Item repeated in 2 other meals.

| Participant ID: _____ Visit #: _____ Date: _____                                  | Portion size        | # units in portion | Frequency* | Number of portions |
|-----------------------------------------------------------------------------------|---------------------|--------------------|------------|--------------------|
| <b>FFQ items</b>                                                                  |                     |                    |            |                    |
| <b>Dairy products</b>                                                             |                     |                    |            |                    |
| Milk, full cream (for cereal)                                                     | cup                 | 1                  |            |                    |
| Yoghurt, regular fat, flavored                                                    | container           | 1                  |            |                    |
| <b>Extra items:</b> (e.g., Hilo/skimmed milk, milk powder, plain yoghurt, cheese) |                     |                    |            |                    |
|                                                                                   |                     | 1                  |            |                    |
|                                                                                   |                     | 1                  |            |                    |
| <b>Eggs</b>                                                                       |                     |                    |            |                    |
| Eggs, fried/scrambled <sup>\$</sup>                                               | unit                | 1                  |            |                    |
| Savory egg dishes (omelette/scrambled, + additions)                               | serve               | 1                  |            |                    |
| <b>Extra items:</b> (e.g., hard-boiled/poached eggs)                              |                     |                    |            |                    |
|                                                                                   |                     | 1                  |            |                    |
|                                                                                   |                     | 1                  |            |                    |
| <b>Meat (alone, or in stews/sauces/casseroles/curry/sandwiches)</b>               |                     |                    |            |                    |
| Bacon                                                                             | slice               | 1                  |            |                    |
| Sausage <sup>\$</sup>                                                             | unit                | 1                  |            |                    |
| <b>Extra items:</b> (e.g., tinned or fresh fish, seafood, ham)                    |                     |                    |            |                    |
|                                                                                   |                     | 1                  |            |                    |
|                                                                                   |                     | 1                  |            |                    |
| <b>Vegetables (alone, or in mixed dishes)</b>                                     |                     |                    |            |                    |
| Potato, sweet potato, sweetcorn <sup>\$\$</sup>                                   | Exchange equivalent | 1                  |            |                    |
| Baked beans <sup>\$\$</sup>                                                       | cup                 | 1                  |            |                    |
| <b>Extra items:</b> (e.g., fresh vegetables/salads)                               |                     |                    |            |                    |
|                                                                                   |                     | 1                  |            |                    |
|                                                                                   |                     | 1                  |            |                    |

\*Frequency:

If consumed at least once a week, provide exact number of days per week (1 to 7).

If consumed at least once a month but less than once a week, provide code for times per month (M1, M2, M3).

**TEMPLATE:** Fill in 'Frequency'\* & 'Number of portions' for all items consumed **at least once a month**.

Ask about **Extra items**; if yes add item name, portion, frequency and # portions.

<sup>§</sup>Item repeated in 1 other meal. <sup>§§</sup>Item repeated in 2 other meals.

| Participant ID: _____ Visit #: _____ Date: _____                                              | Portion size        | # units in portion | Frequency* | Number of portions |
|-----------------------------------------------------------------------------------------------|---------------------|--------------------|------------|--------------------|
| <b>FFQ items</b>                                                                              |                     |                    |            |                    |
| <b>Fast foods</b>                                                                             |                     |                    |            |                    |
| Muffin, English style, with sausage or bacon/egg/cheese                                       | unit                | 1                  |            |                    |
| <b>Extra items:</b> (e.g., pastie/sausage roll, hot potato chips)                             |                     |                    |            |                    |
|                                                                                               |                     | 1                  |            |                    |
|                                                                                               |                     | 1                  |            |                    |
| <b>Midday and evening meals</b>                                                               |                     |                    |            |                    |
| <b>Meat (alone, or in stews/sauces/casseroles/curry/sandwiches/meatballs)</b>                 |                     |                    |            |                    |
| Chicken/poultry, with skin                                                                    | serve               | 1                  |            |                    |
| Beef/lamb/pork, visible fat/mince                                                             | serve               | 1                  |            |                    |
| Sausage <sup>§</sup>                                                                          | unit                | 1                  |            |                    |
| Kangaroo/rabbit/wild game                                                                     | serve               | 1                  |            |                    |
| Cooked fish                                                                                   | serve               | 1                  |            |                    |
| Tinned tuna and other tinned fish                                                             | can                 | 1                  |            |                    |
| <b>Extra items:</b> (e.g., chicken without skin, lean beef, ham/luncheon meats, seafood)      |                     |                    |            |                    |
|                                                                                               |                     | 1                  |            |                    |
|                                                                                               |                     | 1                  |            |                    |
| <b>Vegetables (alone or in stews/casseroles/sauces/curry/stirfry)</b>                         |                     |                    |            |                    |
| Potato, sweet potato, sweetcorn <sup>§§</sup>                                                 | Exchange equivalent | 1                  |            |                    |
| All other vegetables/salads <sup>§</sup>                                                      | cup                 | 0.5                |            |                    |
| Baked beans <sup>§§</sup>                                                                     | cup                 | 1                  |            |                    |
| <b>Extra items:</b> (e.g., homemade hot potato chips, potato/rice/pasta salad, other legumes) |                     |                    |            |                    |

\*Frequency:

If consumed at least once a week, provide exact number of days per week (1 to 7).

If consumed at least once a month but less than once a week, provide code for times per month (M1, M2, M3).

**TEMPLATE:** Fill in 'Frequency'\* & 'Number of portions' for all items consumed **at least once a month**.

Ask about **Extra items**; if yes add item name, portion, frequency and # portions.

<sup>\$</sup>Item repeated in 1 other meal. <sup>\$\$</sup>Item repeated in 2 other meals.

| Participant ID: _____ Visit #: _____ Date: _____                                                          | Portion size         | # units in portion | Frequency* | Number of portions |
|-----------------------------------------------------------------------------------------------------------|----------------------|--------------------|------------|--------------------|
| <b>FFQ items</b>                                                                                          |                      |                    |            |                    |
| _____                                                                                                     |                      | 1                  |            |                    |
| _____                                                                                                     |                      | 1                  |            |                    |
| <b>Bread</b>                                                                                              |                      |                    |            |                    |
| Bread/toast, white flour <sup>\$\$</sup>                                                                  | slice                | 1                  |            |                    |
| Bread/toast, wholemeal/mixed grain flour <sup>\$\$</sup>                                                  | slice                | 1                  |            |                    |
| <b>Extra items:</b> (e.g., savoury biscuits, bread rolls, flat wraps/tortillas, damper)                   |                      |                    |            |                    |
| _____                                                                                                     |                      | 1                  |            |                    |
| _____                                                                                                     |                      | 1                  |            |                    |
| <b>Grains-Starches</b>                                                                                    |                      |                    |            |                    |
| Rice, white (incl. in mixed dishes)                                                                       | heaped serving spoon | 1                  |            |                    |
| Pasta, noodles (incl. in mixed dishes)                                                                    | heaped serving spoon | 1                  |            |                    |
| <b>Extra items:</b> (e.g., brown rice, wholegrain noodles/pasta, porridge, muesli bars, breakfast cereal) |                      |                    |            |                    |
| _____                                                                                                     |                      | 1                  |            |                    |
| _____                                                                                                     |                      | 1                  |            |                    |
| <b>Spreads-Dips</b>                                                                                       |                      |                    |            |                    |
| Butter, plain, salted <sup>\$\$</sup>                                                                     | teaspoon             | 1                  |            |                    |
| Margarine, regular <sup>\$\$</sup>                                                                        | teaspoon             | 1                  |            |                    |
| Tomato sauce (ketchup)                                                                                    | tablespoon           | 1                  |            |                    |
| Mayonaise, regular fat                                                                                    | tablespoon           | 1                  |            |                    |
| Vegetemite/Promote <sup>\$\$</sup>                                                                        | teaspoon             | 1                  |            |                    |
| <b>Extra items:</b> (e.g., avocado, peanut butter, reduced salt butter/margarine)                         |                      |                    |            |                    |
| _____                                                                                                     |                      | 1                  |            |                    |
| _____                                                                                                     |                      | 1                  |            |                    |

\*Frequency:

If consumed at least once a week, provide exact number of days per week (1 to 7).

If consumed at least once a month but less than once a week, provide code for times per month (M1, M2, M3).

**TEMPLATE:** Fill in 'Frequency'\* & 'Number of portions' for all items consumed **at least once a month**.

Ask about **Extra items**; if yes add item name, portion, frequency and # portions.

<sup>§</sup>Item repeated in 1 other meal. <sup>§§</sup>Item repeated in 2 other meals.

| Participant ID: _____ Visit #: _____ Date: _____                                                   | Portion size | # units in portion | Frequency* | Number of portions |
|----------------------------------------------------------------------------------------------------|--------------|--------------------|------------|--------------------|
| <b>FFQ items</b>                                                                                   |              |                    |            |                    |
| <b>Sauces (on meat, stew/casseroles, pasta/noodles, rice, vegetables)</b>                          |              |                    |            |                    |
| Gravy                                                                                              | tablespoon   | 1                  |            |                    |
| Asian marinade/soy sauce                                                                           | tablespoon   | 1                  |            |                    |
| Tomato sauce for pasta bolognese, salsa, tacos                                                     | cup          | 0.5                |            |                    |
| <b>Extra items:</b> (e.g., cream-based sauces, salad dressings, barbeque sauce, chutney/relish)    |              |                    |            |                    |
|                                                                                                    |              | 1                  |            |                    |
|                                                                                                    |              | 1                  |            |                    |
| <b>Dairy</b>                                                                                       |              |                    |            |                    |
| Cheese (cheddar, any other hard yellow cheese) <sup>§</sup>                                        | slice        | 1                  |            |                    |
| <b>Extra items:</b> (e.g., yoghurt, soft/spread cheeses, weight loss milk shakes, milk for cereal) |              |                    |            |                    |
|                                                                                                    |              | 1                  |            |                    |
|                                                                                                    |              | 1                  |            |                    |
| <b>Eggs</b>                                                                                        |              |                    |            |                    |
| Eggs, fried/scrambled <sup>§</sup>                                                                 | unit         | 1                  |            |                    |
| <b>Extra items:</b> (e.g., hard-boiled/poached eggs, omelette/scrambled eggs)                      |              |                    |            |                    |
|                                                                                                    |              | 1                  |            |                    |
|                                                                                                    |              | 1                  |            |                    |
| <b>Fast foods</b>                                                                                  |              |                    |            |                    |
| Pizza, with meat                                                                                   | slice        | 1                  |            |                    |
| Hot dog, bread roll                                                                                | unit         | 1                  |            |                    |
| Hamburger, bread roll, beef patty <sup>§</sup>                                                     | unit         | 1                  |            |                    |
| Hot potato chips/fries/wedges, fast food/take away <sup>§</sup>                                    | serve        | 1                  |            |                    |

\*Frequency:

If consumed at least once a week, provide exact number of days per week (1 to 7).

If consumed at least once a month but less than once a week, provide code for times per month (M1, M2, M3).

**TEMPLATE:** Fill in 'Frequency'\* & 'Number of portions' for all items consumed **at least once a month**.

Ask about **Extra items**; if yes add item name, portion, frequency and # portions.

<sup>\$</sup>Item repeated in 1 other meal. <sup>\$\$</sup>Item repeated in 2 other meals.

| Participant ID: _____ Visit #: _____ Date: _____                                                                                | Portion size | # units in portion | Frequency* | Number of portions |
|---------------------------------------------------------------------------------------------------------------------------------|--------------|--------------------|------------|--------------------|
| <b>FFQ items</b>                                                                                                                |              |                    |            |                    |
| <b>Extra items:</b> (e.g., pastie/pie, grilled chicken wrap/burger, crispy/coated chicken, fried fish, toasted cheese sandwich) |              |                    |            |                    |
|                                                                                                                                 |              | 1                  |            |                    |
|                                                                                                                                 |              | 1                  |            |                    |
| <b>Deep-fat Frying (meat/fish/vegetables)</b>                                                                                   |              |                    |            |                    |
| Oil for deep-fat frying                                                                                                         | tablespoon   | 1                  |            |                    |
| <b>Between meal snacks / desserts</b>                                                                                           |              |                    |            |                    |
| <b>Bread</b>                                                                                                                    |              |                    |            |                    |
| Bread/toast, white flour <sup>\$\$</sup>                                                                                        | slice        | 1                  |            |                    |
| Bread/toast, wholemeal/mixed grain flour <sup>\$\$</sup>                                                                        | slice        | 1                  |            |                    |
| <b>Extra items:</b> (e.g., savoury biscuits, damper, crumpet, fruit bread)                                                      |              |                    |            |                    |
|                                                                                                                                 |              | 1                  |            |                    |
|                                                                                                                                 |              | 1                  |            |                    |
| <b>Grains-Starches</b>                                                                                                          |              |                    |            |                    |
| Breakfast cereal, refined grains (corn, oat, rice) <sup>\$</sup>                                                                | cup          | 1                  |            |                    |
| <b>Extra items:</b> (e.g., muesli/protein bars, breakfast cereals/porridge, noodles/pasta)                                      |              |                    |            |                    |
|                                                                                                                                 |              | 1                  |            |                    |
|                                                                                                                                 |              | 1                  |            |                    |
| <b>Spreads-Sauces</b>                                                                                                           |              |                    |            |                    |
| Butter, plain, salted <sup>\$\$</sup>                                                                                           | teaspoon     | 1                  |            |                    |
| Margarine, regular <sup>\$\$</sup>                                                                                              | teaspoon     | 1                  |            |                    |

\*Frequency:

If consumed at least once a week, provide exact number of days per week (1 to 7).

If consumed at least once a month but less than once a week, provide code for times per month (M1, M2, M3).

**TEMPLATE:** Fill in 'Frequency'\* & 'Number of portions' for all items consumed **at least once a month**.

Ask about **Extra items**; if yes add item name, portion, frequency and # portions.

<sup>\$</sup>Item repeated in 1 other meal. <sup>\$\$</sup>Item repeated in 2 other meals.

| Participant ID: _____ Visit #: _____ Date: _____                                                | Portion size        | # units in portion | Frequency* | Number of portions |
|-------------------------------------------------------------------------------------------------|---------------------|--------------------|------------|--------------------|
| <b>FFQ items</b>                                                                                |                     |                    |            |                    |
| Vegemite/Promote <sup>\$\$</sup>                                                                | teaspoon            | 1                  |            |                    |
| <b>Extra items:</b> (e.g., avocado, chutney/relish, peanut butter, jam)                         |                     |                    |            |                    |
|                                                                                                 |                     | 1                  |            |                    |
|                                                                                                 |                     | 1                  |            |                    |
| <b>Dairy</b>                                                                                    |                     |                    |            |                    |
| Cheese (chedder, any hard yellow cheese) <sup>\$</sup>                                          | slice               | 1                  |            |                    |
| <b>Extra items:</b> (e.g., yoghurt, soft/spread cheeses, cream)                                 |                     |                    |            |                    |
|                                                                                                 |                     | 1                  |            |                    |
|                                                                                                 |                     | 1                  |            |                    |
| <b>Eggs</b>                                                                                     |                     |                    |            |                    |
| Eggs, hard-boiled/poached                                                                       | unit                | 1                  |            |                    |
| <b>Extra items:</b> (e.g., fried/scrambled eggs, savoury egg dishes)                            |                     |                    |            |                    |
|                                                                                                 |                     | 1                  |            |                    |
|                                                                                                 |                     | 1                  |            |                    |
| <b>Meat</b>                                                                                     |                     |                    |            |                    |
| Sausage <sup>\$\$</sup>                                                                         | unit                | 1                  |            |                    |
| Spam/Polony/processed luncheon meat                                                             | slice               | 1                  |            |                    |
| <b>Extra items:</b> (e.g., tinned fish, ham/luncheon meats, wild game, chicken, beef/lamb/pork) |                     |                    |            |                    |
|                                                                                                 |                     | 1                  |            |                    |
|                                                                                                 |                     | 1                  |            |                    |
| <b>Vegetables</b>                                                                               |                     |                    |            |                    |
| Potato, sweet potato, sweetcorn <sup>\$\$</sup>                                                 | Exchange equivalent | 1                  |            |                    |
| All other vegetables/salads <sup>\$</sup>                                                       | cup                 | 0.5                |            |                    |

\*Frequency:

If consumed at least once a week, provide exact number of days per week (1 to 7).

If consumed at least once a month but less than once a week, provide code for times per month (M1, M2, M3).

**TEMPLATE:** Fill in 'Frequency'\* & 'Number of portions' for all items consumed **at least once a month**.

Ask about **Extra items**; if yes add item name, portion, frequency and # portions.

<sup>\$</sup>Item repeated in 1 other meal. <sup>\$\$</sup>Item repeated in 2 other meals.

| Participant ID: _____ Visit #: _____ Date: _____                                                                                       | Portion size | # units in portion | Frequency* | Number of portions |
|----------------------------------------------------------------------------------------------------------------------------------------|--------------|--------------------|------------|--------------------|
| <b>FFQ items</b>                                                                                                                       |              |                    |            |                    |
| Baked beans <sup>\$\$</sup>                                                                                                            | cup          | 1                  |            |                    |
| <b>Extra items:</b> (e.g., potato/rice/pasta salad, other legumes)                                                                     |              |                    |            |                    |
|                                                                                                                                        |              | 1                  |            |                    |
|                                                                                                                                        |              | 1                  |            |                    |
| <b>Fast foods</b>                                                                                                                      |              |                    |            |                    |
| Hamburger, bread roll, beef patty <sup>\$</sup>                                                                                        | unit         | 1                  |            |                    |
| Hot potato chips/fries/wedges, fast food/take away <sup>\$</sup>                                                                       | serve        | 1                  |            |                    |
| <b>Extra items:</b> (e.g., grilled chicken salad/sandwich, pizza, pastie/sausage roll, crispy chicken burger, toasted cheese sandwich) |              |                    |            |                    |
|                                                                                                                                        |              | 1                  |            |                    |
|                                                                                                                                        |              | 1                  |            |                    |
| <b>Fruit</b>                                                                                                                           |              |                    |            |                    |
| Fresh/frozen fruit                                                                                                                     | serve        | 1                  |            |                    |
| <b>Extra items:</b> (e.g., canned fruit, dried fruit)                                                                                  |              |                    |            |                    |
|                                                                                                                                        |              | 1                  |            |                    |
|                                                                                                                                        |              | 1                  |            |                    |
| <b>Desserts (cake, biscuits)</b>                                                                                                       |              |                    |            |                    |
| Biscuit, sweet, with filling/icing/ additions                                                                                          | unit         | 1                  |            |                    |
| Cake or cupcake, iced/filled                                                                                                           | slice/unit   | 1                  |            |                    |
| <b>Extra items:</b> (e.g., banana bread, pudding, doughnut/ croissant, plain biscuits, cheesecake)                                     |              |                    |            |                    |
|                                                                                                                                        |              | 1                  |            |                    |
|                                                                                                                                        |              | 1                  |            |                    |
| <b>Lollies and ice cream</b>                                                                                                           |              |                    |            |                    |
| Ice cream, regular fat                                                                                                                 | ball/scoop   | 1                  |            |                    |

\*Frequency:

If consumed at least once a week, provide exact number of days per week (1 to 7).

If consumed at least once a month but less than once a week, provide code for times per month (M1, M2, M3).



**TEMPLATE:** Fill in 'Frequency'\* & 'Number of portions' for all items consumed **at least once a month**.

Ask about **Extra items**; if yes add item name, portion, frequency and # portions.

<sup>\$</sup>Item repeated in 1 other meal. <sup>\$\$</sup>Item repeated in 2 other meals.

| Participant ID: _____ Visit #: ____ Date: _____                                                  |  | Portion size | # units in portion | Frequency* | Number of portions |
|--------------------------------------------------------------------------------------------------|--|--------------|--------------------|------------|--------------------|
| <b>FFQ items</b>                                                                                 |  |              |                    |            |                    |
| Chocolate, milk/dark/white                                                                       |  | unit         | 4                  |            |                    |
| Lollies, all varieties                                                                           |  | unit         | 1                  |            |                    |
| <b>Extra items:</b> (e.g., chocolate-coated bars, toppings. diet [lo-fat, lo-sugar] ice cream, ) |  |              |                    |            |                    |
|                                                                                                  |  |              | 1                  |            |                    |
|                                                                                                  |  |              | 1                  |            |                    |
| <b>Nuts</b>                                                                                      |  |              |                    |            |                    |
| Nuts, all types, roasted, salted                                                                 |  | handful      | 1                  |            |                    |
| <b>Extra items:</b> (e.g., unsalted nuts)                                                        |  |              |                    |            |                    |
|                                                                                                  |  |              | 1                  |            |                    |
|                                                                                                  |  |              | 1                  |            |                    |
| <b>Salty snacks</b>                                                                              |  |              |                    |            |                    |
| Potato or veggie crisps/chips                                                                    |  | packet       | 1                  |            |                    |
| <b>Extra items:</b> (e.g., twisties/cheezels, popcorn, pretzels, olives)                         |  |              |                    |            |                    |
|                                                                                                  |  |              | 1                  |            |                    |
|                                                                                                  |  |              | 1                  |            |                    |
| <b>Drinks</b>                                                                                    |  |              |                    |            |                    |
| <b>Hot drinks</b>                                                                                |  |              |                    |            |                    |
| Tea, regular, black                                                                              |  | cup          | 1                  |            |                    |
| Coffee, instant or ground (prepared with water)                                                  |  | cup          | 1                  |            |                    |
| Sugar, white (for tea/coffee)                                                                    |  | teaspoon     | 1                  |            |                    |
| <b>Extra items:</b> (e.g., cappuccino/latte, herbal tea, coffee mix-prepared)                    |  |              |                    |            |                    |
|                                                                                                  |  |              | 1                  |            |                    |

\*Frequency:

If consumed at least once a week, provide exact number of days per week (1 to 7).

If consumed at least once a month but less than once a week, provide code for times per month (M1, M2, M3).

**TEMPLATE:** Fill in 'Frequency'\* & 'Number of portions' for all items consumed **at least once a month**.

Ask about **Extra items**; if yes add item name, portion, frequency and # portions.

<sup>§</sup>Item repeated in 1 other meal. <sup>§§</sup>Item repeated in 2 other meals.

| Participant ID: _____ Visit #: ____ Date: _____                                | Portion size | # units in portion | Frequency* | Number of portions |
|--------------------------------------------------------------------------------|--------------|--------------------|------------|--------------------|
| <b>FFQ items</b>                                                               |              | 1                  |            |                    |
| <b>Milk drinks</b>                                                             |              |                    |            |                    |
| Milk, full cream (incl. added to tea/coffee)                                   | cup          | 1                  |            |                    |
| <b>Extra items:</b> (e.g., Hilo milk, flavoured milk, shakes, dairy smoothies) |              |                    |            |                    |
|                                                                                |              | 1                  |            |                    |
|                                                                                |              | 1                  |            |                    |
| <b>Cold drinks</b>                                                             |              |                    |            |                    |
| Water (tap, bottled, mineral, sparkling)                                       | cup          | 1                  |            |                    |
| 100% juice, natural                                                            | cup          | 1                  |            |                    |
| Soft drink/fruit drink/cordial/slushie, regular                                | cup          | 1                  |            |                    |
| <b>Extra items:</b> (e.g., energy/sports drinks, diet drinks, non-dairy milks) |              |                    |            |                    |
|                                                                                |              | 1                  |            |                    |
|                                                                                |              | 1                  |            |                    |
| <b>Alcoholic drinks</b>                                                        |              |                    |            |                    |
| Beer, regular                                                                  | can          | 1                  |            |                    |
| Wine, red/white                                                                | wine glass   | 1                  |            |                    |
| Mixed drinks/cocktails (rum/whisky/scotch and cola)                            | can          | 1                  |            |                    |
| <b>Extra items:</b> (e.g., light beer, spirits)                                |              |                    |            |                    |
|                                                                                |              | 1                  |            |                    |
|                                                                                |              | 1                  |            |                    |

\*Frequency:

If consumed at least once a week, provide exact number of days per week (1 to 7).

If consumed at least once a month but less than once a week, provide code for times per month (M1, M2, M3).

**TEMPLATE:** Fill in 'Frequency'\* & 'Number of portions' for all items consumed **at least once a month**.

Ask about **Extra items**; if yes add item name, portion, frequency and # portions.

<sup>\$</sup>Item repeated in 1 other meal. <sup>\$\$</sup>Item repeated in 2 other meals.

| Participant ID: _____ Visit #: _____ Date: _____                                                | Portion size | # units in portion | Frequency* | Number of portions |
|-------------------------------------------------------------------------------------------------|--------------|--------------------|------------|--------------------|
| <b>FFQ items</b>                                                                                |              |                    |            |                    |
| <b>Supplements</b>                                                                              |              |                    |            |                    |
| Multivitamin and/or multimineral                                                                | unit         | 1                  |            |                    |
| <b>Extra items:</b> (e.g., Vitamin D, protein/amino acid supplement, other mineral supplements) |              |                    |            |                    |
|                                                                                                 |              | 1                  |            |                    |
|                                                                                                 |              | 1                  |            |                    |

\*Frequency:

If consumed at least once a week, provide exact number of days per week (1 to 7).

If consumed at least once a month but less than once a week, provide code for times per month (M1, M2, M3).
