# Supplementary material for: Development and Functionality of a Parsimonious Digital Food Frequency Questionnaire for a Clinical Intervention among an Indigenous Population
Source: MDPI journal article supplement (doi:10.3390/nu15235012), 2023-12-04
Supplement: s1 [file s1]

**Supplemental File 1-Tables S1, S2**

**Table S1. List of the 205 food groups derived from the NATISNPAS 24HR dietary intake data of non-remote Aboriginal Australian adults that were entered into regression analyses to identify main contributors to nutrient intake and between-person variability**

| <b>Group Number</b> | <b>Food group</b>         |
|---------------------|---------------------------|
| 1                   | Beef-lamb-pork            |
| 2                   | Processed meat            |
| 3                   | Mixed poultry dishes      |
| 4                   | Poultry                   |
| 5                   | Potato products           |
| 6                   | Mixed red-meat dishes     |
| 7                   | Margarine                 |
| 8                   | Savory pasta/rice dishes  |
| 9                   | Savory pastry             |
| 10                  | Burgers                   |
| 11                  | Milk, full fat            |
| 12                  | Cakes                     |
| 13                  | Fin fish, fried           |
| 14                  | Cheese, ripened, high fat |
| 15                  | Eggs                      |
| 16                  | Other nuts                |
| 17                  | Potato crisps             |
| 18                  | Pizza                     |
| 19                  | Chocolate, filled         |
| 20                  | Salad dressing, full fat  |
| 21                  | Butter                    |
| 22                  | Breads, white             |
| 23                  | Squash                    |
| 24                  | Egg dishes, savory        |
| 25                  | Ice cream, full fat       |
| 26                  | Chocolate, plain          |
| 27                  | Peanut products           |
| 28                  | Potatoes                  |
| 29                  | Sweet biscuits, filled    |
| 30                  | Salads, vegetable based   |
| 31                  | Margarine, low fat        |
| 32                  | Sandwiches                |
| 33                  | Peanuts                   |
| 34                  | Milk drinks, full fat     |
| 35                  | Dairy desserts            |
| 36                  | Pasta and noodles         |
| 37                  | Coffee with milk          |
| 38                  | Soup with meat, homemade  |

| <b>Group Number</b> | <b>Food group</b>                                 |
|---------------------|---------------------------------------------------|
| 39                  | Dairy blend, high fat                             |
| 40                  | Fin fish, fresh                                   |
| 41                  | Porridge                                          |
| 42                  | Sweet biscuits, plain                             |
| 43                  | Breakfast cereal, whole grain, high sugar         |
| 44                  | Breads, mixed grain                               |
| 45                  | Taco-tortilla                                     |
| 46                  | Milk, low fat                                     |
| 47                  | Extruded snacks                                   |
| 48                  | Mixed fish dishes                                 |
| 49                  | Savory biscuits, high calorie                     |
| 50                  | Batter-based products                             |
| 51                  | Salads, vegetable based, added meat, fish or eggs |
| 52                  | Cream, full fat                                   |
| 53                  | Breads, whole grain                               |
| 54                  | Sweet pastry, filled                              |
| 55                  | Mixed processed meat dishes                       |
| 56                  | Muesli bars                                       |
| 57                  | Corn chips                                        |
| 58                  | Fin fish, preserved                               |
| 59                  | Savory sauces, homemade                           |
| 60                  | Savory pastry, fried                              |
| 61                  | Vegetables and sauce                              |
| 62                  | Gravies                                           |
| 63                  | Oil, olive                                        |
| 64                  | Shellfish, fried                                  |
| 65                  | Soup, vegetable, homemade                         |
| 66                  | Sweet breads                                      |
| 67                  | Other root vegetables                             |
| 68                  | Yogurt, full fat                                  |
| 69                  | Carrots                                           |
| 70                  | Yogurt, flavored, full fat                        |
| 71                  | Tomato                                            |
| 72                  | Savory biscuits, plain, low calorie               |
| 73                  | Fortified beverage                                |
| 74                  | Sports/protein beverage                           |
| 75                  | Legume based dips                                 |
| 76                  | Fried vegetable dishes                            |
| 77                  | Popcorn                                           |
| 78                  | Coffee                                            |
| 79                  | Dairy dips                                        |
| 80                  | Milk drinks, low fat                              |

| <b>Group Number</b> | <b>Food group</b>                        |
|---------------------|------------------------------------------|
| 81                  | Onion, leek and garlic                   |
| 82                  | Other snacks                             |
| 83                  | Egg dishes, sweet                        |
| 84                  | Fried bread                              |
| 85                  | Frozen dairy desserts, other             |
| 86                  | Breakfast cereal, whole grain, low sugar |
| 87                  | Sweet spreads-sauces                     |
| 88                  | Other breads                             |
| 89                  | Meat substitutes                         |
| 90                  | Whole grains                             |
| 91                  | Mixed vegetables                         |
| 92                  | Dairy blend, low fat                     |
| 93                  | Pickles                                  |
| 94                  | Mixed fruit dishes                       |
| 95                  | Sweetcorn                                |
| 96                  | Nut/seeds, sweet                         |
| 97                  | Vegetable-based dips                     |
| 98                  | Ice cream, medium fat                    |
| 99                  | Soy beverages, plain                     |
| 100                 | Pastry, plain                            |
| 101                 | Candies, sugar sweetened                 |
| 102                 | Kangaroo-mammalian game                  |
| 103                 | Liquors                                  |
| 104                 | Cheese, ripened, low fat                 |
| 105                 | Meal replacement beverage                |
| 106                 | Cheese, unripened, full fat              |
| 107                 | Sushi                                    |
| 108                 | Commercial soups with meat               |
| 109                 | Mushrooms                                |
| 110                 | Brassica vegetables                      |
| 111                 | Unfortified beverage                     |
| 112                 | Cream, sour                              |
| 113                 | Custard, low fat                         |
| 114                 | Yogurt, flavored, low fat                |
| 115                 | Cream, sour, low fat                     |
| 116                 | Wild mammalian meat                      |
| 117                 | Mixed dried fruit-nuts                   |
| 118                 | Commercial soups, vegetable              |
| 119                 | Seeds                                    |
| 120                 | Sweet-filled breads                      |
| 121                 | Legume products                          |
| 122                 | Breakfast cereal                         |

| <b>Group Number</b> | <b>Food group</b>                              |
|---------------------|------------------------------------------------|
| 123                 | Oils PUFA                                      |
| 124                 | Yeast                                          |
| 125                 | Shellfish                                      |
| 126                 | Cheese, unripened, low fat                     |
| 127                 | Savory biscuits, whole grain                   |
| 128                 | Breads, gluten free                            |
| 129                 | Salad dressing, low fat                        |
| 130                 | Reptiles                                       |
| 131                 | Meal replacement bar                           |
| 132                 | Milk, non-fat                                  |
| 133                 | Stuffed vegetables                             |
| 134                 | Stalk vegetables                               |
| 135                 | Cream, low fat                                 |
| 136                 | Dried fruit                                    |
| 137                 | Breakfast cereal, whole grain                  |
| 138                 | Other sea-freshwater food                      |
| 139                 | Milk, low fat, fortified                       |
| 140                 | Yogurt, low fat                                |
| 141                 | Herbs/spices                                   |
| 142                 | Custard, full fat                              |
| 143                 | Rice                                           |
| 144                 | Legumes                                        |
| 145                 | Beans                                          |
| 146                 | Coconut and coconut products                   |
| 147                 | Cheese substitute                              |
| 148                 | Cereal flours                                  |
| 149                 | Ice cream, low fat                             |
| 150                 | Fruit bar-sweet                                |
| 151                 | Organ meat                                     |
| 152                 | Honey and sugar syrups                         |
| 153                 | Yogurt, flavored or added fruit, low fat, diet |
| 154                 | Pasta and noodles, whole wheat                 |
| 155                 | Supplementary/medical beverage                 |
| 156                 | Tomato products                                |
| 157                 | Stock                                          |
| 158                 | Tea with milk                                  |
| 159                 | Soft drinks                                    |
| 160                 | Sugar                                          |
| 161                 | Beers, regular                                 |
| 162                 | Wine                                           |
| 163                 | Beers, lite                                    |
| 164                 | Cordials                                       |

| <b>Group Number</b> | <b>Food group</b>                  |
|---------------------|------------------------------------|
| 165                 | Bananas                            |
| 166                 | Spiked soft drink                  |
| 167                 | Fruit drinks                       |
| 168                 | Fruit juices                       |
| 169                 | Pome fruit                         |
| 170                 | Cocktails                          |
| 171                 | Electrolyte drinks (sports drinks) |
| 172                 | Other fruit                        |
| 173                 | Citrus fruit                       |
| 174                 | Spirits                            |
| 175                 | Stone fruit                        |
| 176                 | Tea                                |
| 177                 | Mixed fruit                        |
| 178                 | Tropical fruit                     |
| 179                 | Sugar-based desserts               |
| 180                 | Peas and edible-podded peas        |
| 181                 | Cider                              |
| 182                 | Stone fruit, canned                |
| 183                 | Berry fruit                        |
| 184                 | Leaf vegetables                    |
| 185                 | Fruit juices, fortified            |
| 186                 | Wine, lite                         |
| 187                 | Mixed fruit, canned                |
| 188                 | Diet sweeteners                    |
| 189                 | Chewing gum, no sugar              |
| 190                 | Vegetables, wild                   |
| 191                 | Pome fruit, canned                 |
| 192                 | Desserts, diet                     |
| 193                 | Cordials, diet                     |
| 194                 | Vegetable juices                   |
| 195                 | Other vegetables                   |
| 196                 | Lemons and limes                   |
| 197                 | Soft drinks, diet                  |
| 198                 | Fruits, wild                       |
| 199                 | Chewing gum, sugar sweetened       |
| 200                 | Seaweeds                           |
| 201                 | Energy drinks, diet                |
| 202                 | Herbs, fresh                       |
| 203                 | Sprouts                            |
| 204                 | Essences                           |
| 205                 | Water                              |

NATISNPAS National Aboriginal and Torres Strait Islander Nutrition and Physical Activity Survey 24HR 24-hour recall

**Table S2. Total amount in grams of fresh/frozen fruit items reported in the NATSINPAS and weights for calculating the energy, dietary fiber and potassium values of the composite fresh/frozen fruit FFQ item**

| <b>Food item name</b>                       | <b>Total grams reported for fruit item</b> | <b>Proportion of total fruit intake</b> | <b>Energy kJ/100g of item</b> | <b>Weighted contribution to Energy of composite FFQ item (kJ/100g)</b> | <b>Fiber g/100g of item</b> | <b>Weighted contribution to Fiber of composite FFQ item (g/100g)</b> | <b>Potassium mg/100g of item</b> | <b>Weighted contribution to Potassium of composite FFQ item (mg/100g)</b> |
|---------------------------------------------|--------------------------------------------|-----------------------------------------|-------------------------------|------------------------------------------------------------------------|-----------------------------|----------------------------------------------------------------------|----------------------------------|---------------------------------------------------------------------------|
| Banana, Cavendish, peeled, raw              | 22,826                                     | 0.26                                    | 366                           | 97                                                                     | 2.4                         | 0.6                                                                  | 346                              | 92                                                                        |
| Apple, red skin, unpeeled, raw              | 14,740                                     | 0.17                                    | 224                           | 38                                                                     | 2.3                         | 0.4                                                                  | 99                               | 17                                                                        |
| Orange, peeled, raw                         | 9,960                                      | 0.12                                    | 157                           | 18                                                                     | 2.6                         | 0.3                                                                  | 147                              | 17                                                                        |
| Apple, green skin, unpeeled, raw            | 5,475                                      | 0.06                                    | 183                           | 12                                                                     | 2.4                         | 0.2                                                                  | 101                              | 6                                                                         |
| Grape, Thompson seedless or sultana, raw    | 4,802                                      | 0.06                                    | 257                           | 14                                                                     | 2.3                         | 0.1                                                                  | 207                              | 12                                                                        |
| Mandarin, peeled, raw                       | 4,391                                      | 0.05                                    | 156                           | 8                                                                      | 1.2                         | 0.1                                                                  | 130                              | 7                                                                         |
| Melon, watermelon, peeled, raw              | 3,867                                      | 0.04                                    | 96                            | 4                                                                      | 0.4                         | 0.0                                                                  | 98                               | 4                                                                         |
| Pear, unpeeled, raw                         | 3,005                                      | 0.03                                    | 219                           | 8                                                                      | 3.6                         | 0.1                                                                  | 110                              | 4                                                                         |
| Nectarine, yellow, unpeeled, raw            | 2,582                                      | 0.03                                    | 164                           | 5                                                                      | 2.0                         | 0.1                                                                  | 237                              | 7                                                                         |
| Plum, unpeeled, raw                         | 2,187                                      | 0.03                                    | 146                           | 4                                                                      | 2.0                         | 0.1                                                                  | 153                              | 4                                                                         |
| Nectarine, white, peeled or unpeeled, raw   | 1,389                                      | 0.02                                    | 164                           | 3                                                                      | 2.0                         | 0.0                                                                  | 237                              | 4                                                                         |
| Peach, unpeeled, raw                        | 1,341                                      | 0.02                                    | 149                           | 2                                                                      | 1.9                         | 0.0                                                                  | 201                              | 3                                                                         |
| Kiwifruit, green (Hayward), peeled, raw     | 1,287                                      | 0.01                                    | 187                           | 3                                                                      | 3.8                         | 0.1                                                                  | 259                              | 4                                                                         |
| Grape, raw                                  | 1,083                                      | 0.01                                    | 272                           | 3                                                                      | 2.7                         | 0.0                                                                  | 229                              | 3                                                                         |
| Grape, red globe, raw                       | 854                                        | 0.01                                    | 294                           | 3                                                                      | 3.5                         | 0.0                                                                  | 270                              | 3                                                                         |
| Apple, red skin, peeled, raw                | 820                                        | 0.01                                    | 243                           | 2                                                                      | 2.1                         | 0.0                                                                  | 96                               | 1                                                                         |
| Melon, rock melon (cantaloupe), peeled, raw | 759                                        | 0.01                                    | 91                            | 1                                                                      | 1.0                         | 0.0                                                                  | 215                              | 2                                                                         |
| Pear, raw                                   | 572                                        | 0.01                                    | 220                           | 1                                                                      | 3.6                         | 0.0                                                                  | 113                              | 1                                                                         |
| Peach, white, unpeeled, raw                 | 508                                        | 0.01                                    | 141                           | 1                                                                      | 1.9                         | 0.0                                                                  | 196                              | 1                                                                         |
| Peach, yellow, unpeeled, raw                | 435                                        | 0.01                                    | 152                           | 1                                                                      | 1.9                         | 0.0                                                                  | 203                              | 1                                                                         |
| Pear, nashi, peeled or unpeeled, raw        | 380                                        | 0.00                                    | 192                           | 1                                                                      | 2.1                         | 0.0                                                                  | 130                              | 1                                                                         |
| Pear, peeled, raw                           | 376                                        | 0.00                                    | 221                           | 1                                                                      | 3.3                         | 0.0                                                                  | 129                              | 1                                                                         |

| Food item name                            | Total grams reported for fruit item | Proportion of total fruit intake | Energy kJ/100g of item | Weighted contribution to Energy of composite FFQ item (kJ/100g) | Fiber g/100g of item | Weighted contribution to Fiber of composite FFQ item (g/100g) | Potassium mg/100g of item | Weighted contribution to Potassium of composite FFQ item (mg/100g) |
|-------------------------------------------|-------------------------------------|----------------------------------|------------------------|-----------------------------------------------------------------|----------------------|---------------------------------------------------------------|---------------------------|--------------------------------------------------------------------|
| Apple, red delicious, unpeeled, raw       | 328                                 | 0.00                             | 230                    | 1                                                               | 2.3                  | 0.0                                                           | 102                       | 0                                                                  |
| Apple, unpeeled, raw                      | 316                                 | 0.00                             | 218                    | 1                                                               | 2.3                  | 0.0                                                           | 99                        | 0                                                                  |
| Apple, pink lady, unpeeled, raw           | 306                                 | 0.00                             | 228                    | 1                                                               | 2.4                  | 0.0                                                           | 88                        | 0                                                                  |
| Nectarine, yellow, peeled, raw            | 287                                 | 0.00                             | 170                    | 1                                                               | 1.9                  | 0.0                                                           | 242                       | 1                                                                  |
| Grapefruit, peeled, raw                   | 279                                 | 0.00                             | 111                    | 0                                                               | 1.7                  | 0.0                                                           | 120                       | 0                                                                  |
| Melon, honey dew, peeled raw              | 236                                 | 0.00                             | 120                    | 0                                                               | 1.0                  | 0.0                                                           | 155                       | 0                                                                  |
| Apple, green skin, peeled, raw            | 203                                 | 0.00                             | 207                    | 0                                                               | 2.1                  | 0.0                                                           | 104                       | 0                                                                  |
| Kiwifruit, green (Hayward), unpeeled, raw | 172                                 | 0.00                             | 182                    | 0                                                               | 4.2                  | 0.0                                                           | 273                       | 1                                                                  |
| Pear, green, peeled, raw                  | 151                                 | 0.00                             | 219                    | 0                                                               | 3.3                  | 0.0                                                           | 132                       | 0                                                                  |
| Apricot, raw                              | 100                                 | 0.00                             | 151                    | 0                                                               | 2.5                  | 0.0                                                           | 335                       | 0                                                                  |
| Grape, black muscatel, raw                | 85                                  | 0.00                             | 328                    | 0                                                               | 2.7                  | 0.0                                                           | 160                       | 0                                                                  |
| Cherry, raw                               | 56                                  | 0.00                             | 238                    | 0                                                               | 1.5                  | 0.0                                                           | 230                       | 0                                                                  |
| Total                                     | 86,159                              | Summed composite nutrient value: |                        | Energy (kJ/100g)                                                |                      | Dietary Fiber (g/100g)                                        |                           | Potassium (mg/100g)                                                |
|                                           |                                     |                                  |                        | 236                                                             |                      | 2.3                                                           |                           | 197                                                                |

#### Derivation of the Food Frequency Questionnaire (FFQ) item nutrient values in the Kaat Koort Research study

The nutrient values for the foods and beverages in the study FFQ food database were derived from the Australian Food and Nutrient Database nutrient values of the individual food items, weighted by their consumption quantity as reported in the 24HR data of the National Aboriginal and Torres Strait Islander Nutrition and Physical Activity Survey (NATSINPAS). Supplemental Table 2 presents the 35 individual items reported in the 24HR data that were combined into the study FFQ item of 'fresh/frozen fruit', with the total amount in grams for each item and weight for calculating the contribution of each reported 24HR item to the nutrient values of the composite FFQ item.
