# Supplementary material for: Development and Functionality of a Parsimonious Digital Food Frequency Questionnaire for a Clinical Intervention among an Indigenous Population
Source: MDPI journal article supplement (doi:10.3390/nu15235012), 2023-12-04
Supplement: s1 [file s1]

**Supplemental Table S4. Detailed list 24HR food and beverage group contributors to kJ and other nutrients of interest**

| <b>Contributors</b>                           | <b>Percent contribution to total energy intake</b> |
|-----------------------------------------------|----------------------------------------------------|
| <b><i>Contributors to Energy</i></b>          |                                                    |
| Breads, white,fort                            | 6.45                                               |
| Beef-lamb-pork                                | 4.70                                               |
| Soft drinks                                   | 3.75                                               |
| Processed meat                                | 3.47                                               |
| Hot potato chips                              | 3.40                                               |
| Milk, full fat                                | 3.13                                               |
| Mixed poultry dishes                          | 3.08                                               |
| Savoury pasta/rice dishes                     | 3.06                                               |
| Cakes                                         | 2.71                                               |
| Poultry                                       | 2.69                                               |
| Burgers                                       | 2.63                                               |
| Savoury pastry                                | 2.52                                               |
| Sugar                                         | 2.18                                               |
| Mixed red-meat dishes                         | 2.17                                               |
| Beers, regular                                | 2.01                                               |
| Pizza                                         | 1.79                                               |
| Wine                                          | 1.66                                               |
| Cheese, ripened, hi fat                       | 1.61                                               |
| Beers, lite                                   | 1.54                                               |
| Potatoes                                      | 1.49                                               |
| Fin fish, fried                               | 1.32                                               |
| Breads, whole grain,fort                      | 1.27                                               |
| Breads, mixed grain,fort                      | 1.21                                               |
| Ice cream, full fat                           | 1.19                                               |
| Breakfast cereal, whole grain, fort, lo sugar | 1.17                                               |
| Cordials                                      | 1.15                                               |
| Chocolate, filled                             | 1.07                                               |
| Rice                                          | 1.02                                               |
| Margarine                                     | 0.97                                               |
| Eggs                                          | 0.94                                               |
| Milk drinks, full fat                         | 0.92                                               |
| Bananas                                       | 0.92                                               |
| Butter                                        | 0.89                                               |
| Breakfast cereal, muesli                      | 0.83                                               |
| Sweet biscuits, filled                        | 0.82                                               |
| Spiked soft drink                             | 0.79                                               |
| Chocolate, plain                              | 0.78                                               |
| Milk, lo fat                                  | 0.78                                               |
| Fruit drinks                                  | 0.75                                               |
| Sandwiches                                    | 0.74                                               |
| Potato crisps                                 | 0.74                                               |
| Porridge                                      | 0.72                                               |

**Supplemental Table S4. Detailed list 24HR food and beverage group contributors to kJ and other nutrients of interest**

| <b>Contributors</b> | <b>Percent contribution to total energy intake</b> |
|---------------------|----------------------------------------------------|
| Pasta and noodles   | 0.69                                               |
| Fruit juices        | 0.68                                               |
| Pome fruit          | 0.66                                               |
| Egg dishes, savoury | 0.60                                               |
| Coffee with milk    | 0.60                                               |
| Subtotal            | 80.25                                              |

***Additional Contributors to Protein***

|                         |      |
|-------------------------|------|
| Fin fish, fresh         | 0.34 |
| Fin fish, preserved     | 0.33 |
| Sports/protein beverage | 0.43 |
| Subtotal                | 1.10 |

***Additional Contributors to Total Fat\****

|                          |      |
|--------------------------|------|
| Sweet biscuits, filled   | 0.82 |
| Dairy desserts           | 0.47 |
| Other nuts               | 0.53 |
| Salad dressing, full fat | 0.53 |
| Squash                   | 0.40 |
| Salads, vegetable based  | 0.47 |
| Subtotal                 | 3.21 |

***Additional Contributors to Carbohydrates***

|                                    |      |
|------------------------------------|------|
| Electrolyte drinks (sports drinks) | 0.56 |
| Gravies                            | 0.58 |
| Honey and sugar syrups             | 0.29 |
| Candies, sugar sweetened           | 0.36 |
| Cocktails                          | 0.59 |
| Subtotal                           | 2.38 |

***Additional Contributors to Fibre, Sodium, Potassium, Magnesium***

|                             |      |
|-----------------------------|------|
| Citrus fruit                | 0.26 |
| Stone fruit                 | 0.17 |
| Other fruit                 | 0.29 |
| Soup with meat, homemade    | 0.34 |
| Brassica vegetables         | 0.07 |
| Carrots                     | 0.15 |
| Other root vegetables       | 0.19 |
| Peas and edible-podded peas | 0.10 |
| Tomato                      | 0.15 |
| Squash                      | 0.40 |
| Sweetcorn                   | 0.18 |
| Mixed vegetables            | 0.30 |
| Salads, vegetable based     | 0.47 |
| Legume products             | 0.20 |
| Water                       | 0.00 |
| Taco-tortilla               | 0.34 |

**Supplemental Table S4. Detailed list 24HR food and beverage group contributors to kJ and other nutrients of interest**

| <b>Contributors</b>    | <b>Percent contribution to total energy intake</b> |
|------------------------|----------------------------------------------------|
| Doughnut/crepe/pancake | 0.47                                               |
| Yeast                  | 0.08                                               |
| Fortified beverage     | 0.29                                               |
| Subtotal               | 4.45                                               |
| <b>TOTAL</b>           | <b>91.40</b>                                       |

\*Includes fat from preparation or serve methods (e.g., stir-fried; additions of cheese, nuts, dressings)
