# Supplementary material for: Development and Functionality of a Parsimonious Digital Food Frequency Questionnaire for a Clinical Intervention among an Indigenous Population
Source: MDPI journal article supplement (doi:10.3390/nu15235012), 2023-12-04
Supplement: s1 [file s1]

**Table S5. Contributions of the main and 'extra'<sup>1</sup> I-ACE FFQ items to (A) the total intake of energy, and selected nutrients and (B) food groups reported by initial Kaat Koort participants by sex (n=60)**

| Nutrient or food group                             | Percent contribution to total reported intake |             |            |             |
|----------------------------------------------------|-----------------------------------------------|-------------|------------|-------------|
|                                                    | Women (n=42)                                  |             | Men (n=18) |             |
|                                                    | Main items                                    | Extra items | Main items | Extra items |
| <b>A. Energy and nutrients</b>                     |                                               |             |            |             |
| Energy (kJ)                                        | 68.8                                          | 31.2        | 70.6       | 29.4        |
| Protein (g)                                        | 64.3                                          | 35.7        | 68.8       | 31.2        |
| Total fat (g)                                      | 64.9                                          | 35.1        | 66.9       | 33.1        |
| Fibre (g)                                          | 81.5                                          | 18.5        | 79.8       | 20.2        |
| Carbohydrates (g)                                  | 73.7                                          | 26.3        | 73.4       | 26.6        |
| Total sugar (g)                                    | 74.5                                          | 25.5        | 76.0       | 24.0        |
| Free sugar (g)                                     | 77.5                                          | 22.5        | 76.7       | 23.3        |
| Calcium (mg)                                       | 62.4                                          | 37.6        | 67.8       | 32.2        |
| Sodium (mg)                                        | 69.5                                          | 30.5        | 66.1       | 33.9        |
| Magnesium (mg)                                     | 67.1                                          | 32.9        | 70.0       | 30.0        |
| Potassium (mg)                                     | 70.6                                          | 29.4        | 73.8       | 26.2        |
| <b>B. Food groups (serves)</b>                     |                                               |             |            |             |
| Total grains                                       | 78.9                                          | 21.1        | 77.8       | 22.2        |
| Whole grains                                       | 86.5                                          | 13.5        | 80.4       | 19.6        |
| Total Vegetables                                   | 91.5                                          | 8.5         | 86.4       | 13.6        |
| Fruit                                              | 93.8                                          | 6.2         | 89.0       | 11.0        |
| Total dairy                                        | 51.1                                          | 48.9        | 62.3       | 37.7        |
| Low fat dairy                                      | 42.0                                          | 58.0        | 62.3       | 37.7        |
| Meats and alternative protein sources <sup>2</sup> | 47.5                                          | 52.5        | 64.2       | 35.8        |
| Fast/fried food                                    | 65.8                                          | 34.2        | 59.8       | 40.2        |
| Processed/salty food                               | 68.5                                          | 31.5        | 49.9       | 50.1        |
| Alcoholic drinks                                   | 68.0                                          | 32.0        | 79.7       | 20.3        |

I-ACE Interactive Lifestyle Assessment, Counseling and Education, FFQ food frequency questionnaire

<sup>1</sup>Items not on the main food list, that were chosen by participants who consumed them from the "extra items" lists

<sup>2</sup> Excluding dairy (which are in the dairy group) and legumes (which are in the vegetables group)
