# Supplementary material for: Development and Functionality of a Parsimonious Digital Food Frequency Questionnaire for a Clinical Intervention among an Indigenous Population
Source: Nutrients. 2023 Dec 4;15(23):5012. doi: 10.3390/nu15235012 (PMC10707983; doi:10.3390/nu15235012)
Supplement: Supplementary file 1 [file nutrients-15-05012-s001.zip]

Archive with 5 entries (5 files):
- Supplemental File 1-2. Tables S1,S2-r2.pdf
- Supplemental File S3-Screenshot of Digital FFQ with explanation of Extra item list usage.pdf
- Supplemental File S4. Detailed 24HR contributors to kJ.pdf
- Supplemental File S5. Contributions of the main and extra I-ACE FFQ items by sex.pdf
- Supplemental File S6. Offline iACE FFQ-r1.pdf
